# Supplementary material for: The zebrafish embryo as an in vivo model for screening nanoparticle-formulated lipophilic anti-tuberculosis compounds
Source: Oxford University Press journal article supplement (doi:10.1242/dmm.049147), 2021-11-29
Supplement: dmm049147supp.pdf [file dmm049147supp.pdf]

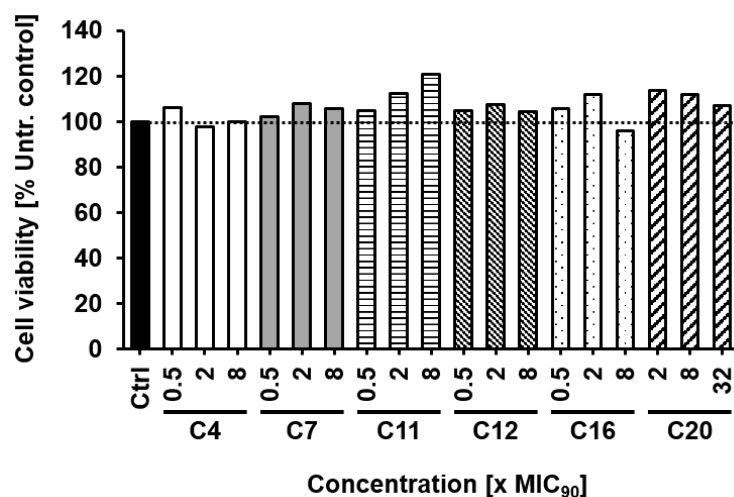

**Fig. S1. Cytotoxicity of nNF-derivatives in bone marrow-derived macrophages (BMDM).** BMDM cells were treated with nNF-derivatives at concentrations ranging from 0.5 to 32 times their MIC for three days and cell viability was measured using the CellTiter-Glo® cell viability assay (Promega Corporation, Wisconsin, USA) according to the producer's protocol.

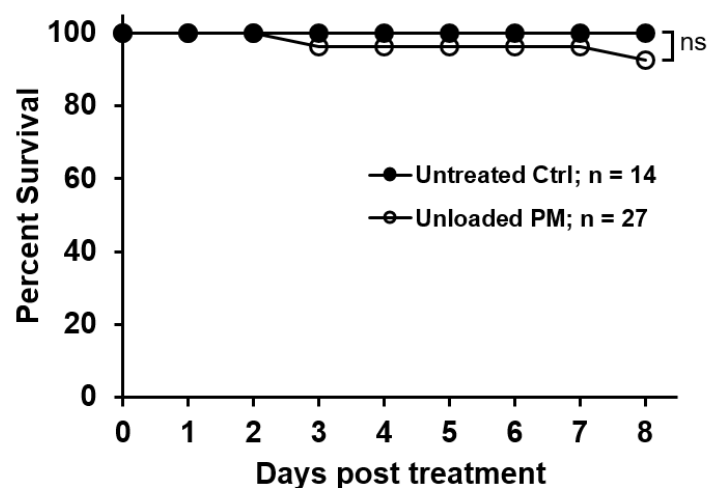

**Fig. S2. *In vivo* toxicity of unloaded PM in zebrafish embryos.** Zebrafish embryos were treated with unloaded PM at a dose equivalent to 150 mg/kg PM-formulated drug by intravenous injection. Mortality was recorded daily until 8 days post treatment and untreated embryos served as negative control. Data represent one experiment and was repeated twice with similar results; ns: not significant.

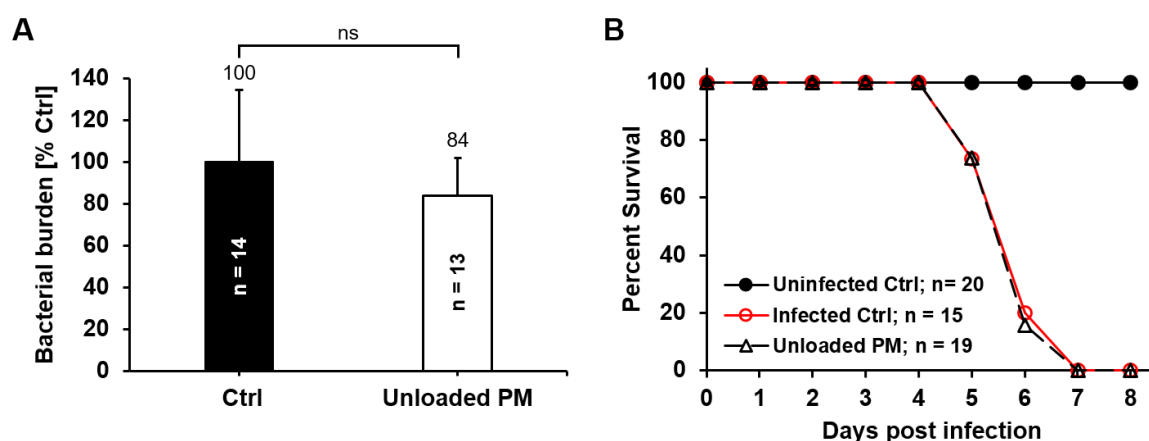

**Fig. S3. Effect of unloaded PM on bacterial burden and survival in zebrafish embryos infected with *M. marinum*.** Zebrafish embryos were infected with *M. marinum*-dsRed and treated 1 day post infection with unloaded PM at a dose equivalent to 75 mg/kg PM-formulated drug by intravenous injection. (A) Quantification of bacterial burden by FPC at 4 days post treatment in *M. marinum* infected embryos treated with unloaded PM or left untreated. FPC values of individual embryos were normalized to the untreated control group and results are presented as the mean  $\pm$  SD. The mean values of each group are displayed above the columns. (B) Survival of the zebrafish embryos used in the FPC assay over a period of 8 days post infection. Uninfected, untreated embryos served as negative control. Data in A) and B) represent one experiment and was repeated twice with similar results; ns: not significant.

**Table S1. *In vitro* activity of nNF-derivatives against extracellular *M. marinum* and intracellular bacteria in bone marrow-derived macrophages (BMDM).** The IC<sub>90</sub> and IC<sub>99</sub> of nNF-derivatives against intracellular *M. marinum* were calculated from the data of the macrophage infection assay shown in Fig. 2 and compared to the activity against extracellular bacteria by calculating the ratio between IC<sub>90</sub> and MIC<sub>90</sub>.

| Drug | MIC <sub>90</sub><br>μg/ml (μM) | IC <sub>90</sub><br>μg/ml (μM) | IC <sub>99</sub><br>μg/ml (μM) | IC <sub>90</sub> /MIC <sub>90</sub> |
|------|---------------------------------|--------------------------------|--------------------------------|-------------------------------------|
| C4   | 0.063 (0.23)                    | 0.05 (0.2)                     | 0.11 (0.4)                     | 0.86                                |
| C7   | 0.016 (0.06)                    | 0.007 (0.03)                   | 0.015 (0.06)                   | 0.44                                |
| C11  | 0.5 (2)                         | 0.31 (1.25)                    | 0.66 (2.62)                    | 0.62                                |
| C12  | 0.25 (0.9)                      | 0.12 (0.45)                    | 0.25 (0.89)                    | 0.56                                |
| C16  | 0.016 (0.07)                    | 0.013 (0.06)                   | 0.03 (0.11)                    | 0.82                                |
| C20  | 0.016 (0.05)                    | 0.4 (1.24)                     | 0.78 (2.45)                    | 24.82                               |
| RIF  | 0.1 (0.12)                      | 0.878 (1.07)                   | 1.97 (2.41)                    | 8.78                                |

**Table S2. Physicochemical characterization of polymeric micelles (PM) incorporating nNF-derivates.** The surface charge (zeta potential), mean hydrodynamic diameter and polydispersity index (PDI) of nNF derivative-encapsulating PM were determined by Dynamic light scattering (DLS) using a Zetasizer (Malvern Panalytical, United Kingdom).

| Name   | Cargo      | % weight<br>drug/polymer | Surface<br>charge [mV] | Diameter [nm] | PDI         |
|--------|------------|--------------------------|------------------------|---------------|-------------|
| PM-C4  | C4         | 14                       | -3.3 ± 0.1             | 130 ± 1       | 0.15 ± 0.01 |
| PM-C7  | C7         | 20                       | -3.5 ± 0.2             | 149 ± 1       | 0.15 ± 0.02 |
| PM-C11 | C11        | 20                       | -3.3 ± 0.4             | 93 ± 2        | 0.13 ± 0.01 |
| PM-C12 | C12        | 20                       | -3.3 ± 0.3             | 89 ± 1        | 0.11 ± 0.01 |
| PM-C16 | C16        | 20                       | -2.5 ± 0.1             | 85 ± 2        | 0.12 ± 0.02 |
| PM-C20 | C20        | 20                       | -2.6 ± 0.1             | 126 ± 1       | 0.12 ± 0.02 |
| PM-RIF | Rifampicin | 10                       | -2.5 ± 0.4             | 84 ± 0(.4)    | 0.14 ± 0.01 |
